10. Tucker GT: Determination of bupivacaine (Marcaine) and other anilide-type local anesthetics in human blood and plasma by gas chromatography. *ANESTHESIOLOGY* 32:255-260, 1970
11. Andersen OS, Engel K: A new acid-base nomogram. *Scand J Clin Lab Invest* 12: 177-186, 1960
12. Munson ES, Wagman IH: Acid-base changes during lidocaine induced seizures in *Macaca mulatta*. *Arch Neurol* 20:406-412, 1969
13. Munson ES, Gutnick MJ, Wagman IH: Local anesthetic drug-induced seizures in rhesus monkeys. *Anesth Analg (Cleve)* 49:986-997, 1970
14. Camerman A, Camerman N: Diphenylhydantoin and diazepam: Molecular structure similarities and steric basis of anticonvulsant activity. *Science* 168:1457-1458, 1970
15. Swinyard EA, Castellion AW: Anticonvulsant properties of some benzodiazepines. *J Pharmacol Exp Ther* 151:369-375, 1966
16. Sharer L, Kutt H: Intravenous administration of diazepam: Effects on penicillin-induced focal seizures in the cat. *Arch Neurol* 24: 169-175, 1971
17. Hernandez-Peon R, Rojas-Ramirez JA, O'Flaherty JJ, et al: An experimental study of the anticonvulsive and relaxant actions of Valium. *Int J Neuropharmacol* 3:405-412, 1964
18. Foldes FF, Davidson GM, Duncalf D, et al: The intravenous toxicity of local anesthetic agents in man. *Clin Pharmacol Ther* 6: 328-335, 1965
19. Jorfeldt L, Lofstrom B, Pernow B, et al: The effect of local anaesthetics on the central circulation and respiration in man and dog. *Acta Anaesthesiol Scand* 12:153-169, 1968
20. Van Der Kleijn E: Kinetics of distribution and metabolism of diazepam and chlordiazepoxide in mice. *Arch Int Pharmacodyn* 178: 193-215, 1969
21. Banerjee CM, Alarie Y, Woolard M: Gas tensions in conscious monkeys. *Proc Soc Exp Biol Med* 128:1183-1185, 1969
22. Munson ES, Gillespie JR, Wagman IH: Respiratory blood gases and pH in two species of unanesthetized monkeys. *J Appl Physiol* 28:108-109, 1970

### Respiration

**ABSENT HYPOXIC PULMONARY VASOCONSTRICTION AND HEPATIC CIRRHOSIS** Evidence that patients with hepatic cirrhosis have increased pulmonary blood flow, arterial oxygen desaturation, decreased pulmonary vascular resistance, and hyperventilation has been presented. Although many explanations for arterial hypoxemia are available, none has been accepted. The shift to the right in the oxyhemoglobin-dissociation curve is not sufficient to explain the degree of desaturation. Common findings include a normal diffusion capacity, an increased alveolar-arterial oxygen tension gradient, and inability to saturate arterial blood fully during breathing of oxygen. These findings, and the results of various isotope gas studies, all favor venous admixture as the fundamental cause of the arterial hypoxemia. However, necropsy studies of patients with hepatic cirrhosis have revealed intrapulmonary arteriovenous anastomoses or portopulmonary venous communications in only a few patients. It has recently been theorized that, in the absence of a ventilatory defect, the arterial hypoxemia might be due to inappropriate distribution of pulmonary flow relative to ventilation. If the pulmonary system were not able to regulate perfusion, then the combination of arterial hypoxemia and low pulmonary vascular resistance might occur. The

authors postulate that impairment of pulmonary hypoxic vasoconstriction might be responsible for both the low pulmonary vascular resistance and the resulting arterial hypoxemia in these patients. Therefore, the effects of low fractional inhalation concentrations of oxygen were studied in patients with cirrhosis, normal subjects, and finally, patients with clinical features similar to cirrhotics, i.e., increased pulmonary flow, anemia, and chronic debilitating illness. Ten patients with alcoholic hepatic cirrhosis breathed 10 per cent oxygen in nitrogen, but failed to demonstrate an increase in pulmonary vascular resistance. However, four patients with functional murmurs, three patients with hyperkinetic heart syndrome, six patients with normal pulmonary arterial pressures and intracardiac left-to-right shunts, and five patients with renal failure and anemia all increased their pulmonary vascular resistances when they breathed 10 per cent oxygen in nitrogen. These findings suggest that in hepatic cirrhosis the normal regulating mechanism of the pulmonary vascular bed, hypoxic vasoconstriction, may be impaired, resulting in failure of the lung to match perfusion to ventilation. (Daoud, F. S., Reeves, J. T., and Schaefer, J. W.: Failure of Hypoxic Pulmonary Vasoconstriction in Patients with Liver Cirrhosis. *J. Clin. Invest.* 51: 1076-1080, 1972.)
